# Supplementary material for: RLEP LAMP for the laboratory confirmation of leprosy: towards a point-of-care test
Source: PubMed Central journal article supplement (PMC8620619; doi:10.1186/s12879-021-06882-2), 2021-11-25
Supplement: 12879_2021_6882_MOESM1_ESM.pdf [file 12879_2021_6882_MOESM1_ESM.pdf]

# RLEP LAMP for the laboratory confirmation of leprosy: towards a point-of-care test

BMC Infectious Diseases

Malkin Saar, Marcus Beissner, Fatih Gültekin, Issaka Maman, Karl-Heinz Herbinger and Gisela Bretzel

## Additional file 1: in-house "wet" RLEP LAMP run protocol

**Assay:** RLEP LAMP  
**Analysis:** Detection of *Mycobacterium leprae* DNA (RLEP)  
**Type of NAAT:** Loop-mediated isothermal amplification  
**Type of Primers:** Wet

| Outer Primer: (5 µM) |                          | Inner Primer: (20µM) |                                                  |
|----------------------|--------------------------|----------------------|--------------------------------------------------|
| RLEP F3              | 5'CGCACCTGATGTTATCCCTT'3 | RLEP FIP             | 5'ATGCCTGCTTGCTGGCTGAG<br>CACCATTCTGCCGCTGG'3    |
| RLEP B3              | 5'GGTTTGGGTGGTGTGTGG'3   | RLEP BIP             | 5'CAGTGCATCGATGATCCGGCC<br>GTGTGGGTGGTTGATCTGC'3 |

| Reagent                                                  | Amount of samples:   |                 | Concentration of stock solution | Final concentration |
|----------------------------------------------------------|----------------------|-----------------|---------------------------------|---------------------|
|                                                          | Single reaction [µl] | Master mix [µl] |                                 |                     |
| Isothermal Master mix ISO-DR-004 [Optigene; Horsham, UK] | 15.00                | 150.00          | -                               | 1x                  |
| Primer F3                                                | 1.00                 | 10.00           | 5 µM                            | 0.2 µM              |
| Primer B3                                                | 1.00                 | 10.00           | 5 µM                            | 0.2 µM              |
| Primer FIP                                               | 2.00                 | 20.00           | 20 µM                           | 1.6 µM              |
| Primer BIP                                               | 2.00                 | 20.00           | 20 µM                           | 1.6 µM              |
| H <sub>2</sub> O                                         | 2.00                 | 20.00           | -                               | -                   |
| Total vol. reaction mix [µl]                             | 23.00                | 230.00          |                                 |                     |
| Template                                                 | 2.00                 |                 |                                 |                     |
| Final volume                                             | 25.00                |                 |                                 |                     |

### Amplification/ Annealing

|   |      |         |
|---|------|---------|
| 1 | 65°C | 30 min. |
|---|------|---------|

### Melting curve

|   |               |
|---|---------------|
| 2 | 80°C – 98.5°C |
|---|---------------|

Detection: FAM channel

Device: Genie III

| Date: |        | Description: |        |                             |                  |                            |
|-------|--------|--------------|--------|-----------------------------|------------------|----------------------------|
| Well  | Sample | Material     | Result | Time to positivity [min:ss] | Fluorescence [k] | Annealing temperature [°C] |
| 1     |        |              |        |                             |                  |                            |
| 2     |        |              |        |                             |                  |                            |
| 3     |        |              |        |                             |                  |                            |
| 4     |        |              |        |                             |                  |                            |
| 5     |        |              |        |                             |                  |                            |
| 6     |        |              |        |                             |                  |                            |
| 7     |        |              |        |                             |                  |                            |
| 8     |        |              |        |                             |                  |                            |

Results interpretation: Result positive if amplification ≤25 min AND fluorescence ≥ 5 [k]

Result negative if amplification >25min OR fluorescence < 5 [k]
