# Supplementary material for: RLEP LAMP for the laboratory confirmation of leprosy: towards a point-of-care test
Source: PubMed Central journal article supplement (PMC8620619; doi:10.1186/s12879-021-06882-2), 2021-11-25
Supplement: 12879_2021_6882_MOESM2_ESM.pdf [file 12879_2021_6882_MOESM2_ESM.pdf]

# RLEP LAMP for the laboratory confirmation of leprosy: towards a point-of-care test

## BMC Infectious Diseases

Malkin Saar, Marcus Beissner, Fatih Gültekin, Issaka Maman, Karl-Heinz Herbinger and Gisela Bretzel

### Additional file 2: in-house lyophilization protocol

#### Protocol:

One vial Isothermal Master mix ISO-DR-004 [Optigene; Horsham, United Kingdom] equals 16 tubes with lyophilized reagents for in-house DRB LAMP (please refer to additional file 3).

*It is of great importance to work quickly with the master mix as soon as it is dissolved in water and until it is frozen. Otherwise it will degrade fast.*

#### Day 1: preparation

- Prepare the lyoadapter from the lyophilization device by freezing to -20°C
- Label 16 lyotubes (0.5ml screw cap micro tubes [SARSTEDT, Nümbrecht, Germany])
- Prepare primer mix:  
870µl (290µl FIP+290µl BIP+ 145µl F3+ 145µl B3), mix
- pipette 54 µl primer mix in each of the 16 tubes
- Prepare master mix: pipette 1500µl H<sub>2</sub>O in one vial Isothermal Master Mix ISO-DR-004 and let it dissolve completely, shake gently  
*Carry on as soon as it is dissolved!*
- Quickly pipette 90µl master mix in each of the 16 tubes
- Zentrifuge the tubes shortly and put them into the prepared Lyoadapter (-20°C)
- Store Lyoadapter including tubes overnight at -80°C

#### Day 2: lyophilization

- Start the lyophilization device (e.g. Alpha 1-2 LDplus [Christ, Osterode, Germany])
- Start "warm up"
- Fetch the lyoadapter including tubes from -80°C and open all the tubes
- Put the lyoadapter including tubes in the device and close the device
- Start drying program
- Let the tubes dry at 0.31 mbar for 20 hours

#### Day 3: end phase

- After ~20h: start the subsequent drying phase
- Let it run for ½-1 hour until it reaches 0.011 mbar or does not go further down
- Open device carefully and slowly
- Close all tubes
- Store lyophilized reaction mix dry and dark at 4°C or room temperature  
*Stable for 12 months at RT and >12 months at 4°C*

#### Lyotest

- Always test the newly lyophilized batch by running one LAMP test (please refer to additional file 3).
- Instead of samples a RLEP standard curve as described in the main paper should be used.
