# Supplementary material for: RLEP LAMP for the laboratory confirmation of leprosy: towards a point-of-care test
Source: PubMed Central journal article supplement (PMC8620619; doi:10.1186/s12879-021-06882-2), 2021-11-25
Supplement: 12879_2021_6882_MOESM3_ESM.pdf [file 12879_2021_6882_MOESM3_ESM.pdf]

# RLEP LAMP for the laboratory confirmation of leprosy: towards a point-of-care test

BMC Infectious Diseases

Malkin Saar, Marcus Beissner, Fatih Gültekin, Issaka Maman, Karl-Heinz Herbinger and Gisela Bretzel

## Additional file 3: in-house RLEP DRB LAMP run protocol

Assay: RLEP LAMP  
 Analysis: Detection of *Mycobacterium leprae* DNA (RLEP)  
 Type of NAAT: Loop-mediated isothermal amplification  
 Type of Primers: Dry reagent based (lyophilization in-house, please refer to additional file 2)

| Outer Primer: (5 µM) |                          | Inner Primer: (20µM) |                                                  |
|----------------------|--------------------------|----------------------|--------------------------------------------------|
| RLEP F3              | 5'CGCACCTGATGTTATCCCTT'3 | RLEP FIP             | 5'ATGCCTGCTTGCTGGCTGAG<br>CACCATTTCTGCCGCTGG'3   |
| RLEP B3              | 5'GGTTTGGGTGGTGTGTGG'3   | RLEP BIP             | 5'CAGTGCATCGATGATCCGGCC<br>GTGTGGGTGGTTGATCTGC'3 |

Amount of samples: 6 samples, 1 positive control, 1 negative control = 8 (+10% additive due to pipetting lost)

| Reagent                      | Single reaction [µl] | Master mix [µl] |
|------------------------------|----------------------|-----------------|
| Dryed master mix             | -                    | 1 tube          |
| Buffer ISO-DR-004            | 15.00                | 135.00          |
| H <sub>2</sub> O             | 8.00                 | 72.00           |
| Total vol. reaction mix [µl] | 23.00                | 207.00          |
| Template                     | 2.00                 |                 |
| Final volume                 | 25.00                |                 |

### Amplification/ Annealing

|   |      |         |
|---|------|---------|
| 1 | 65°C | 30 min. |
|---|------|---------|

### Melting curve

|   |               |
|---|---------------|
| 2 | 80°C – 98.5°C |
|---|---------------|

Detection: FAM channel  
 Device: Genie III

| Date: |        | Description: |        |                             |                  |                            |
|-------|--------|--------------|--------|-----------------------------|------------------|----------------------------|
| Well  | Sample | Material     | Result | Time to positivity [min:ss] | Fluorescence [k] | Annealing temperature [°C] |
| 1     |        |              |        |                             |                  |                            |
| 2     |        |              |        |                             |                  |                            |
| 3     |        |              |        |                             |                  |                            |
| 4     |        |              |        |                             |                  |                            |
| 5     |        |              |        |                             |                  |                            |
| 6     |        |              |        |                             |                  |                            |
| 7     |        |              |        |                             |                  |                            |
| 8     |        |              |        |                             |                  |                            |

Results interpretation: Result positive if amplification ≤25 min AND fluorescence ≥ 5 [k]

Result negative if amplification >25min OR fluorescence < 5 [k]
