# Supplementary material for: RLEP LAMP for the laboratory confirmation of leprosy: towards a point-of-care test
Source: PubMed Central journal article supplement (PMC8620619; doi:10.1186/s12879-021-06882-2), 2021-11-25
Supplement: 12879_2021_6882_MOESM4_ESM.pdf [file 12879_2021_6882_MOESM4_ESM.pdf]

# RLEP LAMP for the laboratory confirmation of leprosy: towards a point-of-care test

BMC Infectious Diseases

Malkin Saar, Marcus Beissner, Fatih Gültekin, Issaka Maman, Karl-Heinz Herbinger and Gisela Bretzel

## Additional file 4: ready-to-use RLEP DRB LAMP run protocol

Assay: RLEP LAMP  
 Analysis: Detection of *Mycobacterium leprae* DNA (RLEP)  
 Type of NAAT: Loop-mediated isothermal amplification  
 Type of Primers: Dry reagent based (lyophilization by Amplexdiagnostics GmbH, Germany)

| Outer Primer: (5 µM) |                          | Inner Primer: (20µM) |                                                  |
|----------------------|--------------------------|----------------------|--------------------------------------------------|
| RLEP F3              | 5'CGCACCTGATGTTATCCCTT'3 | RLEP FIP             | 5'ATGCCTGCTTGCTGGCTGAG<br>CACCATTTCTGCCGCTGG'3   |
| RLEP B3              | 5'GGTTTGGGTGGTGTGTGG'3   | RLEP BIP             | 5'CAGTGCATCGATGATCCGGCC<br>GTGTGGGTGGTTGATCTGC'3 |

|                          |                              | Amount of samples:                                                        | 6 samples, 1 positive control, 1 negative control = 8 |
|--------------------------|------------------------------|---------------------------------------------------------------------------|-------------------------------------------------------|
| Reagent                  | Single reaction [µl]         | No reaction mix, pipette directly into the wells of the delivered strips. |                                                       |
| dried master mix strips  | Already prepared in the well |                                                                           |                                                       |
| resuspension solution RS | 12.50                        |                                                                           |                                                       |
| H <sub>2</sub> O         | 7.50                         |                                                                           |                                                       |
| Total vol. in well [µl]  | 20.00                        |                                                                           |                                                       |
| Template                 | 5.00                         |                                                                           |                                                       |
| Final volume             | 25.00                        |                                                                           |                                                       |

### Amplification/ Annealing

|   |      |         |
|---|------|---------|
| 1 | 65°C | 30 min. |
|---|------|---------|

### Melting curve

|   |               |
|---|---------------|
| 2 | 80°C – 98.5°C |
|---|---------------|

Detection: FAM channel  
 Device: Genie III

| Date: |        | Description: |        |                             |                  |                            |
|-------|--------|--------------|--------|-----------------------------|------------------|----------------------------|
| Well  | Sample | Material     | Result | Time to positivity [min:ss] | Fluorescence [k] | Annealing temperature [°C] |
| 1     |        |              |        |                             |                  |                            |
| 2     |        |              |        |                             |                  |                            |
| 3     |        |              |        |                             |                  |                            |
| 4     |        |              |        |                             |                  |                            |
| 5     |        |              |        |                             |                  |                            |
| 6     |        |              |        |                             |                  |                            |
| 7     |        |              |        |                             |                  |                            |
| 8     |        |              |        |                             |                  |                            |

### Results interpretation:

Result positive if annealing temperature 91.5 ±1°C AND Tp >10 min AND fluorescence ≥ 5 [k]

*If fluorescence >2: Use the Genie Explorer: Result positive if annealing temperature 91.5 ±1°C AND starting fluorescence ≥ 20 [k] AND Tp >10 min (threshold 0.002 ratio)*

Result negative if otherwise
